# Supplementary material
Source: Springer Nature journal article supplement (https://www.springermedizin.de/resource/supplementary/12958_2013_1203_MOESM4_ESM.pdf/9567052)
Supplement: MOESM4 [file 9567052]

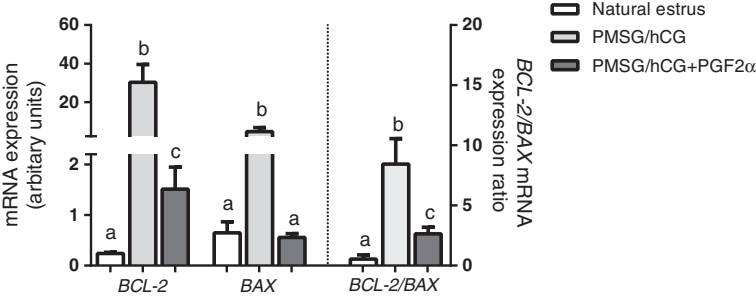

mRNA expression  
(arbitrary units)

60  
40  
20  
2  
1  
0

*BCL-2*

*BAX*

*BCL-2/BAX*

*BCL-2/BAX* mRNA  
expression ratio

20  
15  
10  
5  
0

- Natural estrus
- PMSG/hCG
- PMSG/hCG+PGF2α
